# Supplementary material for: The chlorination mechanism of arsenic during the arsenopyrite decomposition: Experimental and theoretical study
Source: Research Square preprint supplement (doi:10.21203/rs.3.rs-7331372/v1), 2025-08-28
Supplement: Supplementary file 1 [file e6ece10bf22ad4130ad202ea.docx]

**Supplementary Material**

The chlorination mechanism of arsenic during the arsenopyrite decomposition: Experimental and theoretical study

Chan Zou1, Rui Liang1, Huimin Liu2*, Zhong Lin3*, Chunbo Wang4

(1 School of Safety Science and Emergency Management, Wuhan University of Technology, Wuhan 430070, China;

2 School of Naval Architecture, Ocean and Energy Power Engineering, Wuhan University of Technology, Wuhan 430070, China;

3 Faculty of Chemistry and Environmental Science, Guangdong Ocean University, Zhanjiang 524088, China;

4 Department of Energy, Power & Mechanical Engineering, North China Electric Power University, Baoding 071003, China)

Total number of pages: 4

Total number of table and figures: 2

**Figure and Table captions**

**Fig. S1.** The stable optimized structures of arsenic formation on FeS2 (100) surface.

**Table S1** The formation energy and some geometric parameters for arsenic formation on FeS2 (100) surface


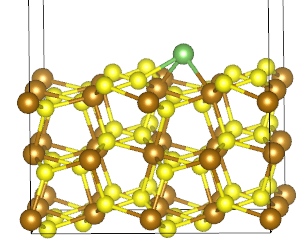

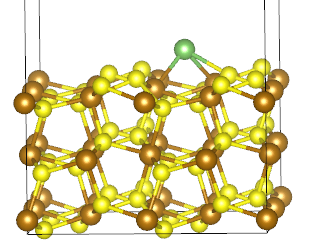


2.517

2.414

2.460

2.467

2.405

2.520

**3**

**1**

**2**

**1**

1-1. FeS2-superficial As 1-2. FeS2-superficial As


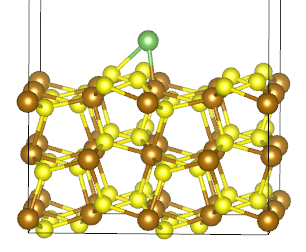

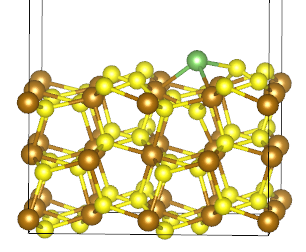


2.368

2.600

2.498

2.295

2.285

**1**

**2**

**1**

1-3. FeS2-superficial As 1-4. FeS2-superficial As

Fig. S1. The stable optimized structures of arsenic formation on FeS2 (100) surface. As atom is green.

**Table S1. The formation energy and some geometric parameters for arsenic formation on FeS2 (100) surface.**

| Structure | ΔE(kJ/mol) | RFe-As(Å) | RS-As(Å) |
| --- | --- | --- | --- |
| 1-1 | -223.40 | 2.520/2.467 | 2.405 |
| 1-2 | -223.44 | 2.460/2.414 | 2.517 |
| 1-3 | -180.42 | 2.295 | 2.285 |
| 1-4 | -234.14 | 2.498/2.600 | 2.368 |
